# Supplementary material for: Electrochemical construction of an alternating multi-layered structure of palladium and gold nanoparticles attached with biferrocene moietiesElectronic supplementary information (ESI) available: cyclic voltammograms for electrodeposition of BFcPdn/BFcAun. See http://www.rsc.org/suppdata/cc/b2/b207513j/
Source: Royal Society of Chemistry journal article supplement (doi:10.1039/b207513j), 2002-10-09
Supplement: b207513j.pdf [file b207513j.pdf]

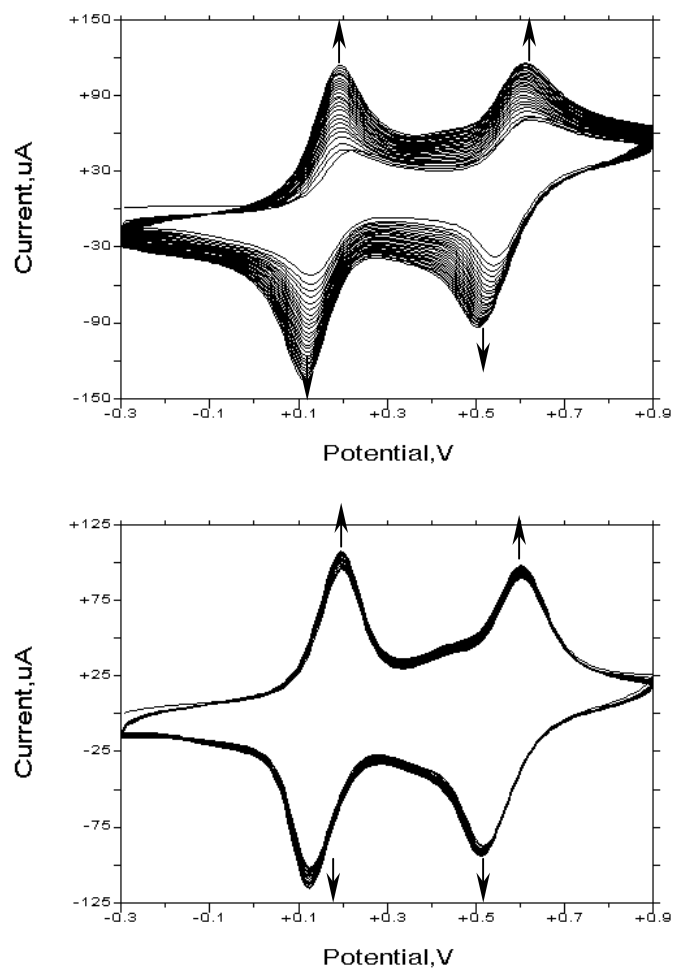

**Fig. S1** (Top) The cyclic voltammograms of  $3.2 \mu\text{mol dm}^{-3}$  BFcPd<sub>n</sub> in  $0.1 \text{ mol dm}^{-3}$  Bu<sub>4</sub>NClO<sub>4</sub>-CH<sub>2</sub>Cl<sub>2</sub> at  $0.1 \text{ V s}^{-1}$  between  $-0.3 \text{ V}$  and  $0.9 \text{ V}$  vs. Ag/Ag<sup>+</sup> with 25 cyclic potential scans at an ITO electrode. (Bottom) The cyclic voltammograms of  $3.2 \mu\text{mol dm}^{-3}$  BFcAu<sub>n</sub> in  $0.1 \text{ mol dm}^{-3}$  Bu<sub>4</sub>NClO<sub>4</sub>-CH<sub>2</sub>Cl<sub>2</sub> at  $0.1 \text{ V s}^{-1}$  between  $-0.3 \text{ V}$  and  $0.9 \text{ V}$  vs. Ag/Ag<sup>+</sup> with 25 cyclic potential scans at an ITO electrode where BFcPd<sub>n</sub>s were pre-electrodeposited by the procedure described in the text.
